# Supplementary material for: Phenylcarbamate-Modified Paper for Paper Chromatographic Analysis of Hydrophobic Compounds
Source: MDPI journal article supplement (doi:10.3390/technologies11010001), 2022-12-20
Supplement: s1 [file s1]

# Phenylcarbamate-modified paper for paper chromatographic analysis of hydrophobic compounds

Bungo Ochiai, Seiya Koseki and Yoshimasa Matsumura

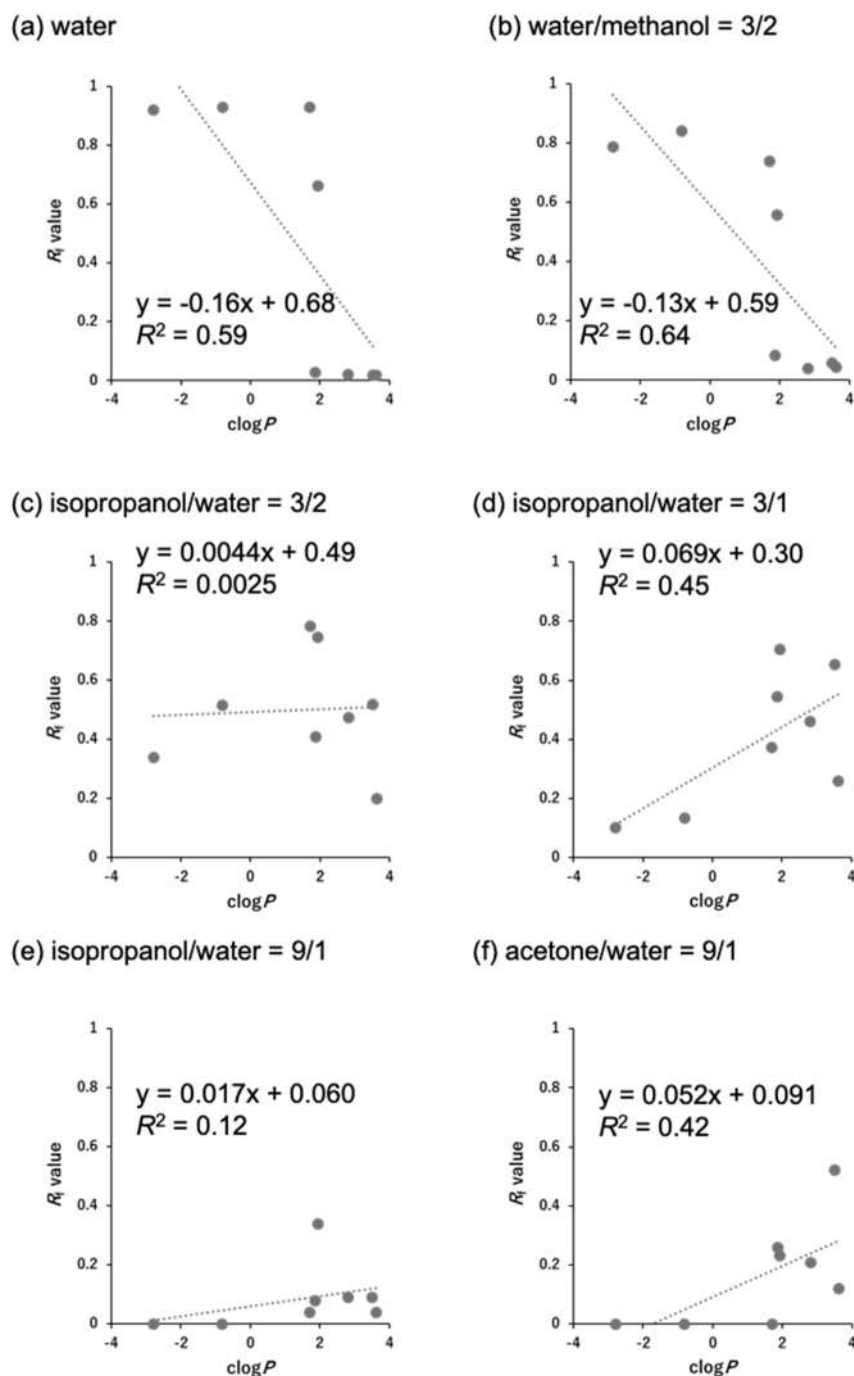

Figure S1. Correlation between  $\log P$  and  $R_f$  values in development on FP eluted by (a) water, (b) water/methanol = 3/2, (c) isopropanol/water = 3/2, (d) isopropanol/water = 3/1, (e) isopropanol/water = 9/1, and (f) acetone/water = 9/1.

(a) water

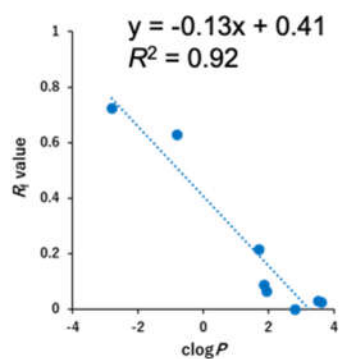

(b) water/methanol = 3/2

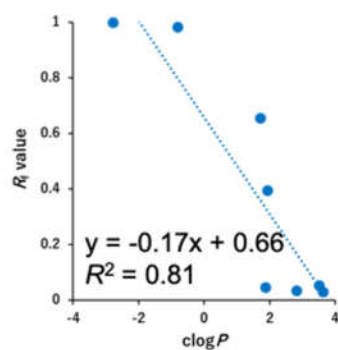

(c) isopropanol/water = 3/2

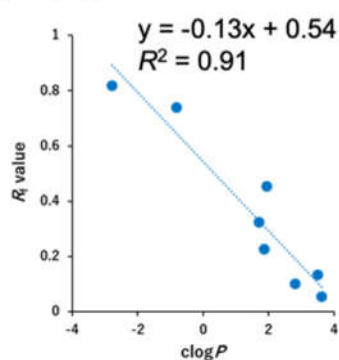

(d) isopropanol/water = 3/1

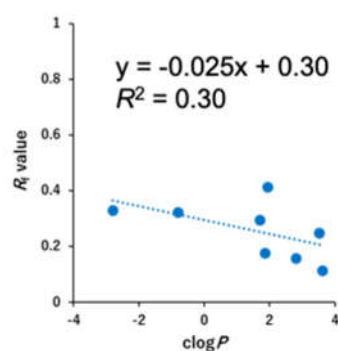

(e) isopropanol/water = 9/1

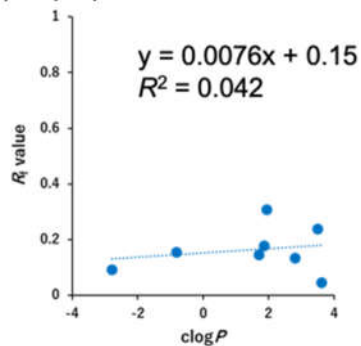

(f) acetone/water = 9/1

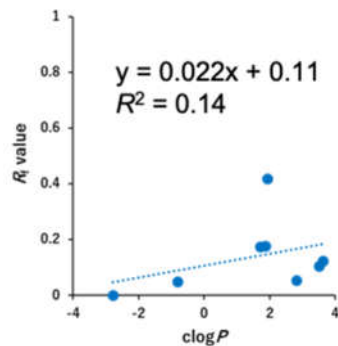

Figure S2. Correlation between  $\text{clog}P$  and  $R_f$  values in development on PI-FP eluted by (a) water, (b) water/methanol = 3/2, (c) isopropanol/water = 3/2, (d) isopropanol/water = 3/1, (e) isopropanol/water = 9/1, and (f) acetone/water = 9/1.

(a) water

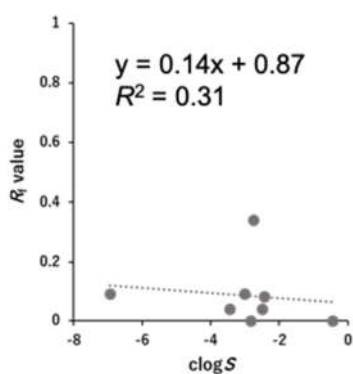

(b) water/methanol = 3/2

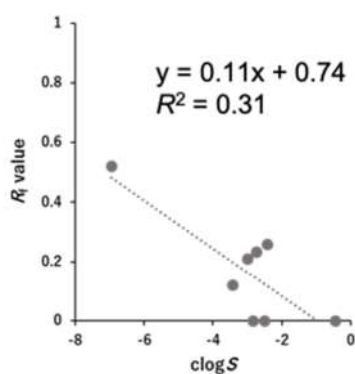

(c) isopropanol/water = 3/2

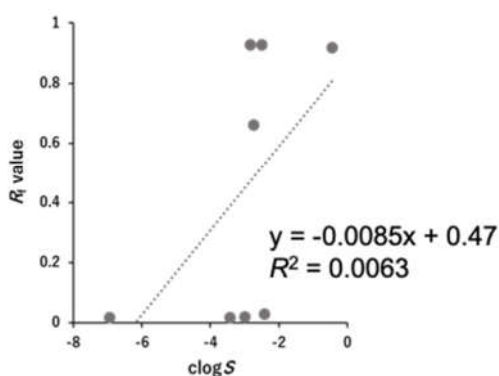

(d) isopropanol/water = 3/1

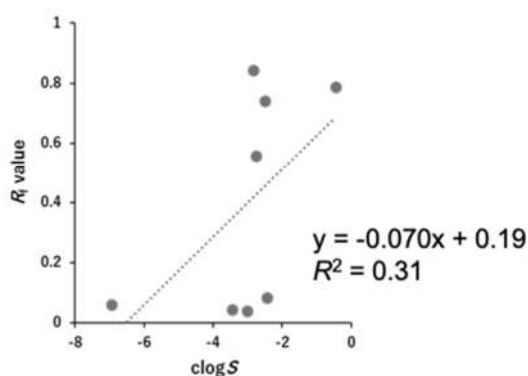

(e) isopropanol/water = 9/1

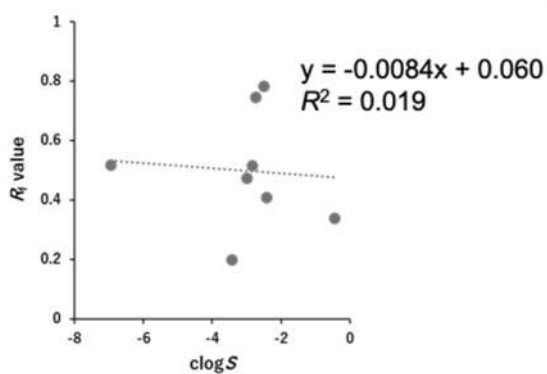

(f) acetone/water = 9/1

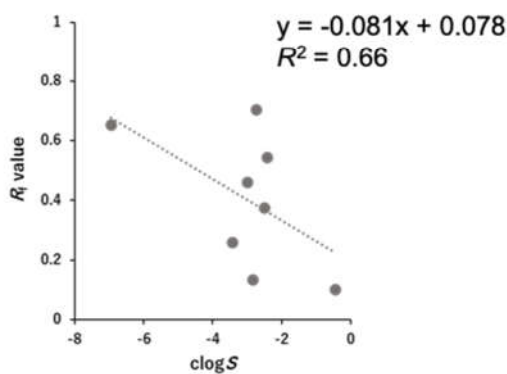

Figure S3. Correlation between  $\text{clog}S$  and  $R_f$  values in development on FP eluted by (a) water, (b) water/methanol = 3/2, (c) isopropanol/water = 3/2, (d) isopropanol/water = 3/1, (e) isopropanol/water = 9/1, and (f) acetone/water = 9/1.

(a) water

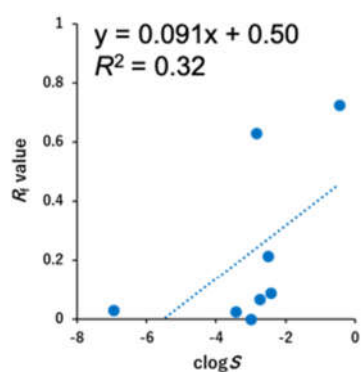

(b) water/methanol = 3/2

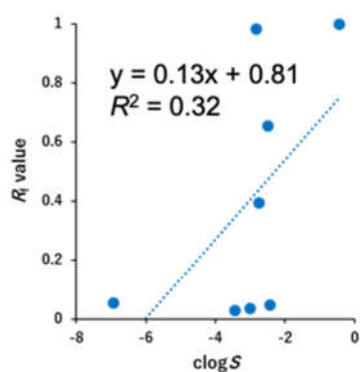

(c) isopropanol/water = 3/2

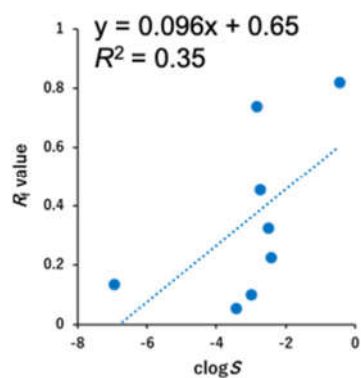

(d) isopropanol/water = 3/1

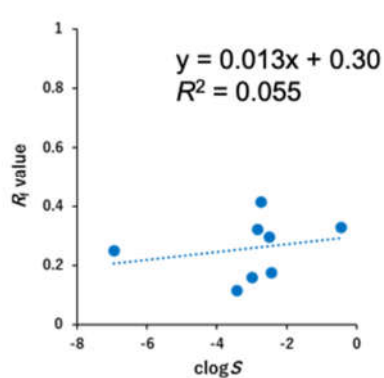

(e) isopropanol/water = 9/1

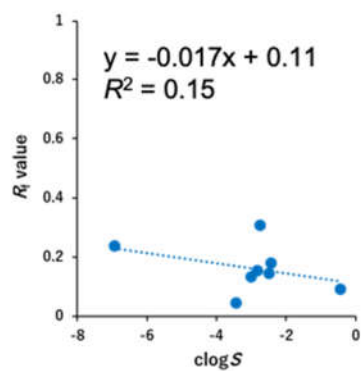

(f) acetone/water = 9/1

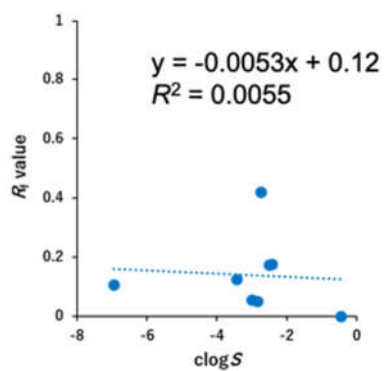

Figure S4. Correlation between  $\log S$  and  $R_f$  values in development on PI-FP eluted by (a) water, (b) water/methanol = 3/2, (c) isopropanol/water = 3/2, (d) isopropanol/water = 3/1, (e) isopropanol/water = 9/1, and (f) acetone/water = 9/1.

(a) water



(b) water/methanol = 3/2



(c) isopropanol/water = 3/2



(d) isopropanol/water = 3/1



(e) isopropanol/water = 9/1



(f) acetone/water = 9/1



Figure S5. Correlation between PSA and  $R_f$  values in development on FP eluted by (a) water, (b) water/methanol = 3/2, (c) isopropanol/water = 3/2, (d) isopropanol/water = 3/1, (e) isopropanol/water = 9/1, and (f) acetone/water = 9/1.

(a) water

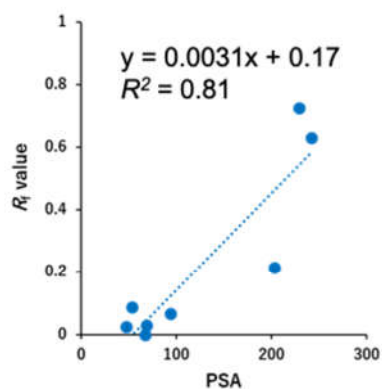

(b) water/methanol = 3/2

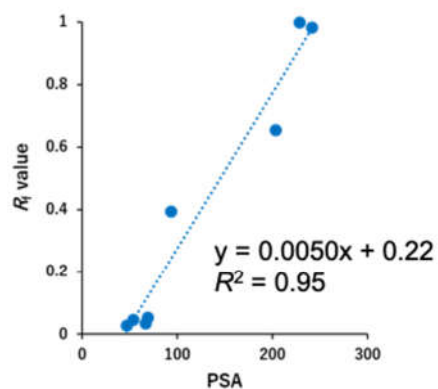

(c) isopropanol/water = 3/2

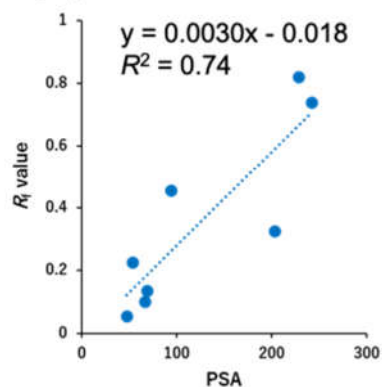

(d) isopropanol/water = 3/1

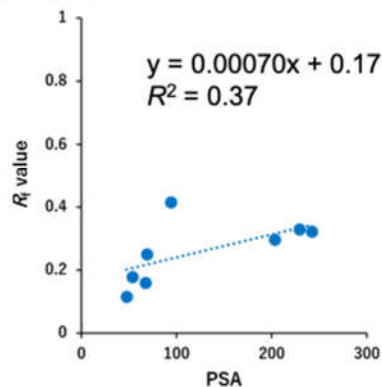

(e) isopropanol/water = 9/1

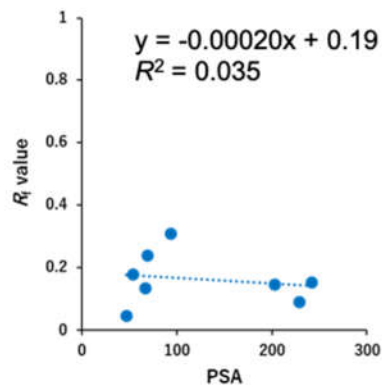

(f) acetone/water = 9/1

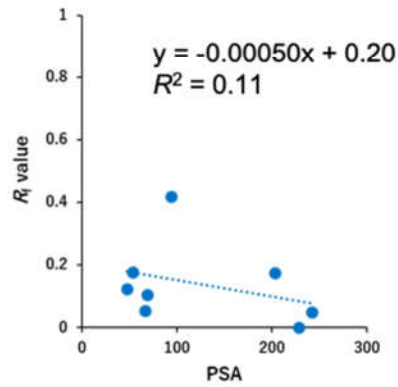

Figure S6. Correlation between PSA and  $R_f$  values in development on PI-FP eluted by (a) water, (b) water/methanol = 3/2, (c) isopropanol/water = 3/2, (d) isopropanol/water = 3/1, (e) isopropanol/water = 9/1, and (f) acetone/water = 9/1.

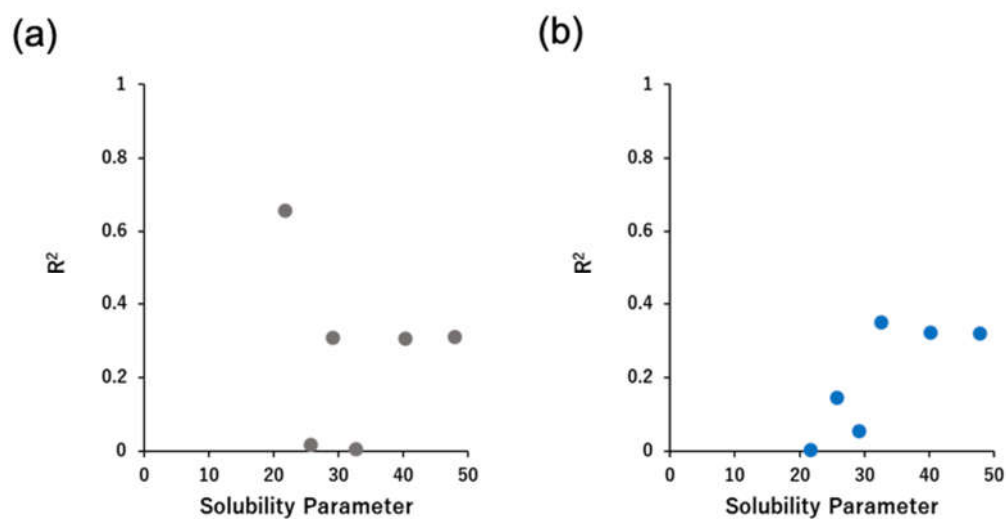

Figure S7. Relationship between solubility parameter of eluent and  $R^2$  of correlation between  $\text{clogS}$  and  $R_f$  value in developments using (a) FP and (b) PI-FP.

**Table S1.**  $\text{clogS}$  and PSA of analytes.

| Analytes           | $\text{clogS}^{\text{a)}$ | PSA <sup>a)</sup> |
|--------------------|---------------------------|-------------------|
| Tartrazine         | -0.45                     | 229               |
| New Coccine        | -2.84                     | 242               |
| Brilliant Blue fcf | -2.50                     | 203               |
| Basic Red 5        | -2.44                     | 53.4              |
| Methyl Orange      | -2.75                     | 93.5              |
| Basic Blue 17      | -3.01                     | 66.7              |
| Basic Red 2        | -6.95                     | 68.8              |
| Methylene Blue     | -3.44                     | 47.1              |
